# Supplementary material for: Indole-3-carbaldehyde Semicarbazone Derivatives: Synthesis, Characterization, and Antibacterial Activities
Source: Hindawi journal article supplement (doi:10.1155/2020/7157281), 2020-03-19
Supplement: f1 [file 7157281.f1.pdf]

# SUPPORTING INFORMATION

associated with the paper

## Indole-3-carbaldehyde semicarbazone derivatives: synthesis, characterization and antibacterial activities

Fernando Carrasco<sup>1,2\*</sup>, Wilfredo Hernández<sup>1,\*</sup>, Oscar Chupayo<sup>3</sup>, Celedonio M. Álvarez<sup>4</sup>, Sandra Oramas-Royo<sup>5</sup>, Evgenia Spodine<sup>6</sup>, Carmen Tamariz-Angeles<sup>7</sup>, Percy Olivera-Gonzales<sup>7</sup>, Juan Z. Dávalos<sup>8,\*</sup>

**Table S1.** Computational results, at B3LYP/6-311++G(d,p) for the synthesized compounds **1-4**, indicating the relative enthalpies ( $\Delta H$ ) of stable conformers and their equilibrium molar fractions (populations).

| Compound         | $E_0^a$       | $G_{298}^a$  | $H_{298}^a$  | $\Delta H^b$ | $\mu^c$ | Population (%) |       |
|------------------|---------------|--------------|--------------|--------------|---------|----------------|-------|
| <b>Gas phase</b> |               |              |              |              |         |                |       |
| <b>1</b>         | <i>cisE</i>   | -3255.050809 | -3254.911800 | -3254.851474 | 0.0     | 6.6            | 98.4  |
|                  | <i>transE</i> | -3255.040251 | -3254.900459 | -3254.840973 | 27.6    | 1.3            | < 0.1 |
|                  | <i>cisZ</i>   | -3255.049470 | -3254.907928 | -3254.849459 | 5.3     | 3.2            | 1.6   |
|                  | <i>transZ</i> | -3255.034754 | -3254.894224 | -3254.835092 | 43.0    | 8.6            | < 0.1 |
| <b>2</b>         | <i>cisE</i>   | -1141.131072 | -1140.990312 | -1140.931390 | 0.0     | 6.6            | 98.3  |
|                  | <i>transE</i> | -1141.120482 | -1140.979122 | -1140.920872 | 27.6    | 1.3            | < 0.1 |
|                  | <i>cisZ</i>   | -1141.129728 | -1140.986502 | -1140.929365 | 5.3     | 3.2            | 1.7   |
|                  | <i>transZ</i> | -1141.115249 | -1140.972923 | -1140.915190 | 42.5    | 7.8            | < 0.1 |
| <b>3</b>         | <i>cisE</i>   | -796.063614  | -795.882397  | -795.820764  | 0.0     | 5.0            | 97.1  |
|                  | <i>transE</i> | -796.052321  | -795.870550  | -795.809559  | 29.4    | 3.5            | < 0.1 |
|                  | <i>cisZ</i>   | -796.062800  | -795.879095  | -795.819238  | 4.0     | 3.7            | 2.9   |
|                  | <i>transZ</i> | -796.048584  | -795.865752  | -795.805313  | 40.6    | 6.4            | < 0.1 |
| <b>4</b>         | <i>cisE</i>   | -886.067000  | -885.914670  | -885.853751  | 0.0     | 9.8            | 99.3  |
|                  | <i>transE</i> | -886.057790  | -885.905898  | -885.844689  | 23.8    | 3.5            | < 0.1 |
|                  | <i>cisZ</i>   | -886.063201  | -885.909912  | -885.849531  | 11.1    | 6.7            | 0.6   |

|                |               |              |              |              |      |      |       |
|----------------|---------------|--------------|--------------|--------------|------|------|-------|
|                | <i>transZ</i> | -886.048547  | -885.896563  | -885.835265  | 48.5 | 10.6 | < 0.1 |
| <b>DMSO</b>    |               |              |              |              |      |      |       |
| 1              | <i>cisE</i>   | -3255.071545 | -3254.932256 | -3254.872302 | 0.0  | 8.9  | 99.0  |
|                | <i>transE</i> | -3255.065972 | -3254.926233 | -3254.866717 | 14.7 | 2.5  | 0.2   |
|                | <i>cisZ</i>   | -3255.068655 | -3254.927791 | -3254.868932 | 8.8  | 4.4  | 0.9   |
|                | <i>transZ</i> | -3255.062547 | -3254.921449 | -3254.862782 | 25.0 | 12.4 | < 0.1 |
| 2              | <i>cisE</i>   | -1141.151749 | -1141.010544 | -1140.952116 | 0.0  | 9.0  | 99.1  |
|                | <i>transE</i> | -1141.146194 | -1141.004357 | -1140.946454 | 14.9 | 2.4  | 0.1   |
|                | <i>cisZ</i>   | -1141.148867 | -1141.005914 | -1140.948695 | 9.0  | 4.4  | 0.7   |
|                | <i>transZ</i> | -1141.142547 | -1141.000303 | -1140.942509 | 25.2 | 11.8 | < 0.1 |
| 3              | <i>cisE</i>   | -796.085256  | -795.903600  | -795.842489  | 0.0  | 6.6  | 98.8  |
|                | <i>transE</i> | -796.079589  | -795.897464  | -795.836751  | 15.1 | 5.4  | 0.1   |
|                | <i>cisZ</i>   | -796.082821  | -795.899337  | -795.839470  | 7.9  | 4.6  | 1.1   |
|                | <i>transZ</i> | -796.076475  | -795.893690  | -795.833279  | 24.2 | 9.4  | < 0.1 |
| 4              | <i>cisE</i>   | -886.091918  | -885.941255  | -885.878999  | 0.0  | 13.9 | 99.5  |
|                | <i>transE</i> | -886.086453  | -885.935397  | -885.873509  | 14.4 | 5.2  | 0.2   |
|                | <i>cisZ</i>   | -886.088371  | -885.935785  | -885.875106  | 10.2 | 9.7  | 0.3   |
|                | <i>transZ</i> | -886.082251  | -885.929722  | -885.868982  | 26.3 | 16.2 | < 0.1 |
| <b>Acetone</b> |               |              |              |              |      |      |       |
| 1              | <i>cisE</i>   | -3255.070572 | -3254.931303 | -3254.871323 | 0.0  | 8.8  | 99.0  |
|                | <i>transE</i> | -3255.064633 | -3254.924875 | -3254.865411 | 15.5 | 2.4  | 0.1   |
|                | <i>cisZ</i>   | -3255.067789 | -3254.926894 | -3254.868050 | 8.6  | 4.4  | 0.9   |
|                | <i>transZ</i> | -3255.061059 | -3254.919791 | -3254.861288 | 26.3 | 12.2 | < 0.1 |
| 2              | <i>cisE</i>   | -1141.150780 | -1141.009575 | -1140.951127 | 0.0  | 8.9  | 99.1  |
|                | <i>transE</i> | -1141.144868 | -1141.002958 | -1140.945101 | 15.8 | 2.3  | 0.1   |
|                | <i>cisZ</i>   | -1141.148005 | -1141.005007 | -1140.947811 | 8.7  | 4.4  | 0.8   |
|                | <i>transZ</i> | -1141.141101 | -1140.998529 | -1140.941015 | 26.5 | 11.6 | < 0.1 |
| 3              | <i>cisE</i>   | -796.084220  | -795.902582  | -795.841433  | 0.0  | 6.6  | 98.8  |
|                | <i>transE</i> | -796.078141  | -795.895937  | -795.835275  | 16.2 | 5.3  | 0.1   |
|                | <i>cisZ</i>   | -796.081904  | -795.898369  | -795.838530  | 7.6  | 4.5  | 1.1   |
|                | <i>transZ</i> | -796.075004  | -795.892006  | -795.831779  | 25.3 | 9.2  | < 0.1 |
| 4              | <i>cisE</i>   | -886.090707  | -885.939664  | -885.877745  | 0.0  | 13.8 | 99.4  |
|                | <i>transE</i> | -886.085030  | -885.933621  | -885.872072  | 14.9 | 5.1  | 0.2   |
|                | <i>cisZ</i>   | -886.087206  | -885.934617  | -885.873907  | 10.1 | 9.5  | 0.5   |
|                | <i>transZ</i> | -886.080458  | -885.927848  | -885.867158  | 27.8 | 15.8 | < 0.1 |

<sup>a</sup>All values in units of Hartree/particle. <sup>b</sup> Values in in kJ·mol<sup>-1</sup>. <sup>c</sup>Values in Debye.  $E_0$  = Total Energies at 0 K.  $H_{298}$  = Enthalpies and  $G_{298}$  = Gibbs Free Energies at 298.15 K.  $\mu$  = Dipole Moment.

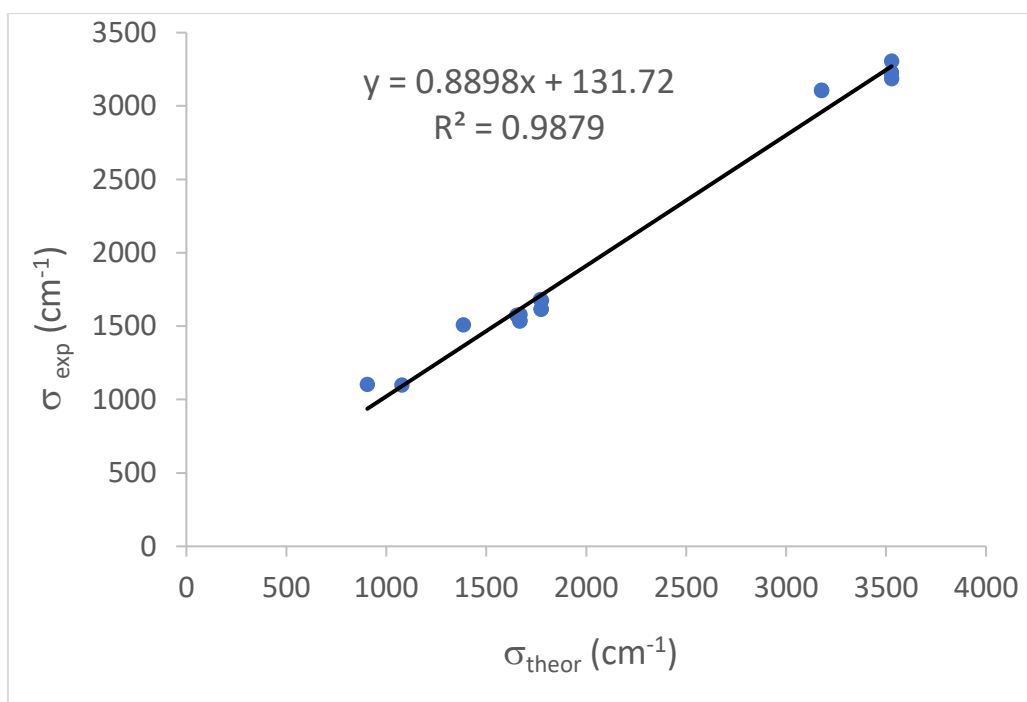

Figure 1. Linear Correlation of vibrational frequencies (given as wave numbers  $\sigma$ , in  $\text{cm}^{-1}$ ) between experimental IR data and the corresponding to B3LYP/6-311++G(d,p) theoretical values for the synthesized compounds **1-4**.

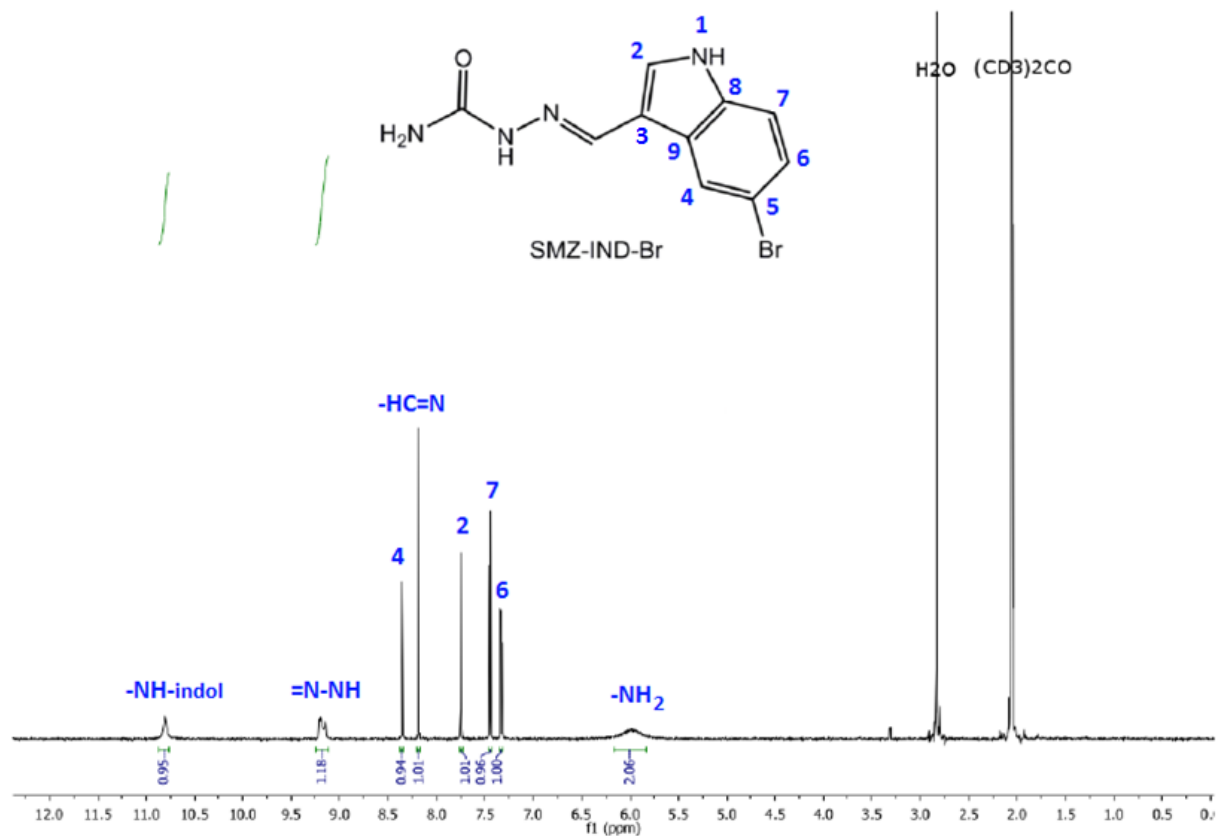

Figure 2.  $^1\text{H}$  NMR spectrum of compound 1 (500 MHz, acetone- $d_6$ )

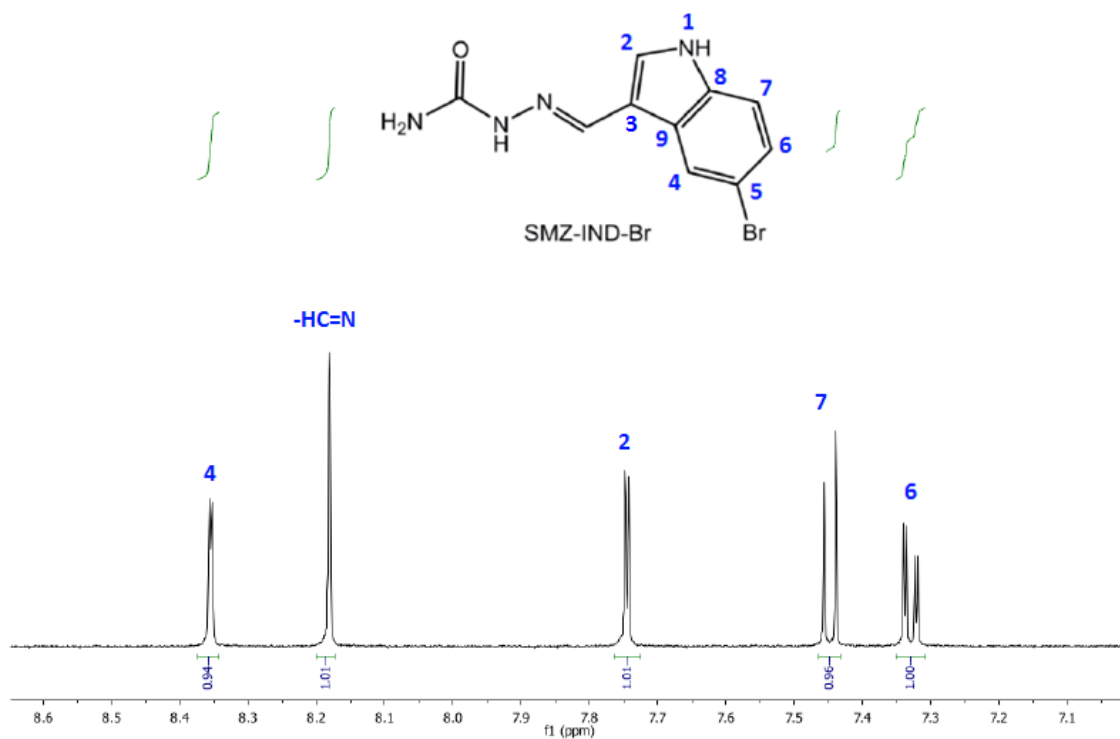

Figure 3.  $^1\text{H}$  NMR spectrum showing the aromatic zone of compound 1 (500 MHz, acetone- $d_6$ )

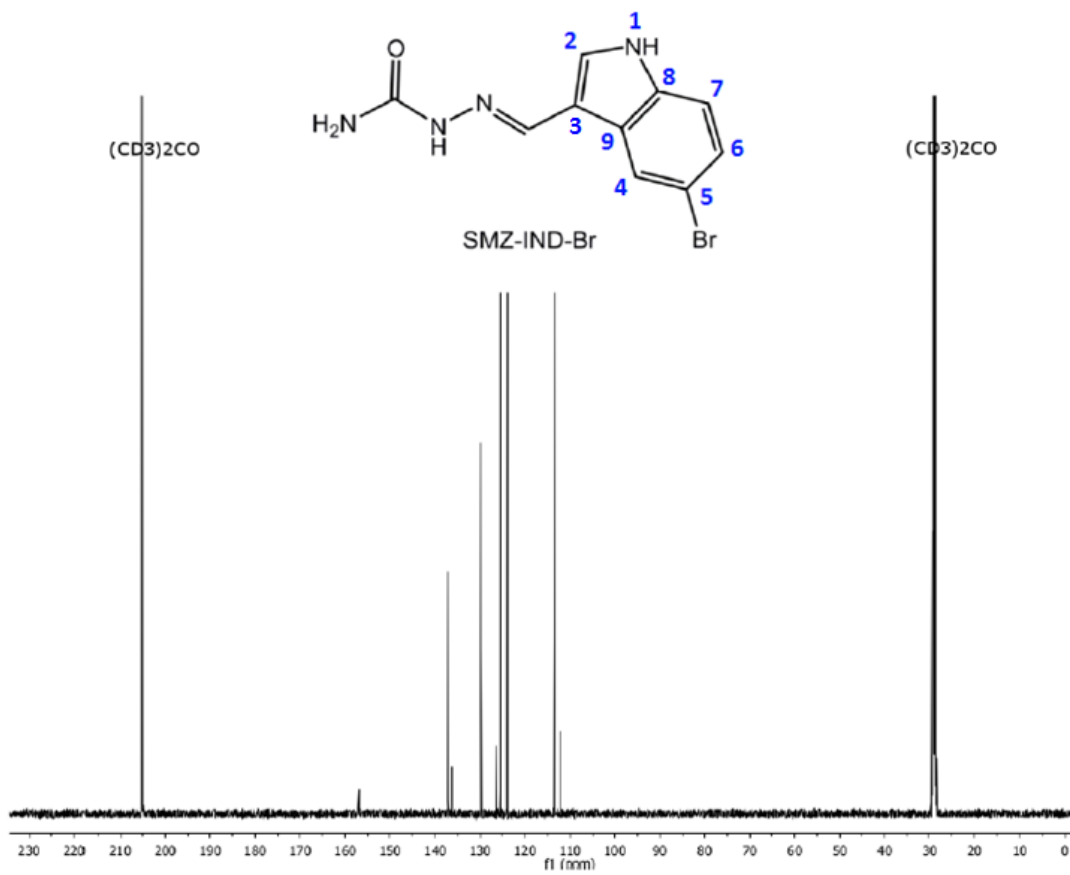

Figure 4.  $^{13}\text{C}\{^1\text{H}\}$  NMR spectrum of compound 1 (126 MHz, acetone- $d_6$ )

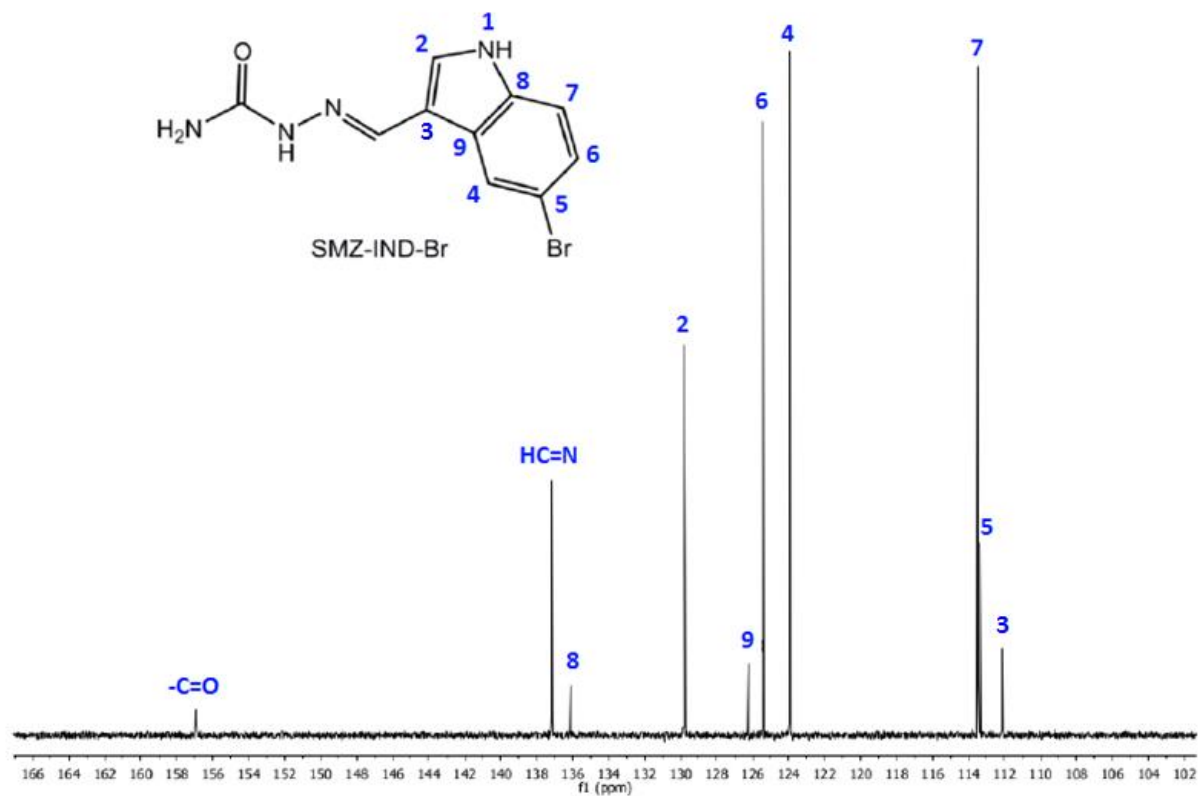

Figure 5.  $^{13}\text{C}\{^1\text{H}\}$ NMR spectrum showing the aromatic zone of compound **1** (126 MHz, acetone- $d_6$ )

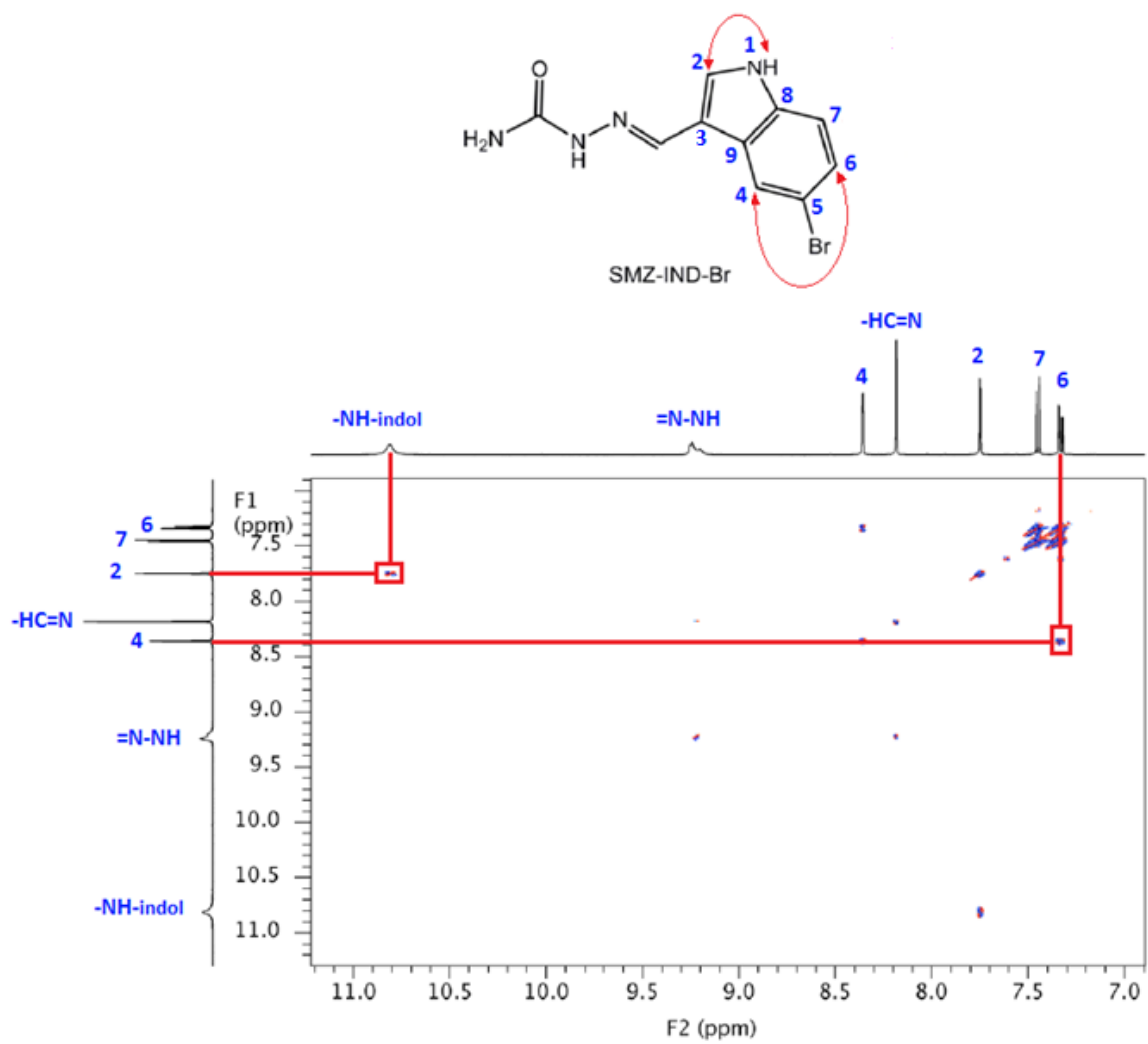

Figure 6. Two-dimensional  $^1\text{H}$ - $^1\text{H}$  DQFCOSY NMR spectrum recorded in acetone- $d_6$  for the compound **1**

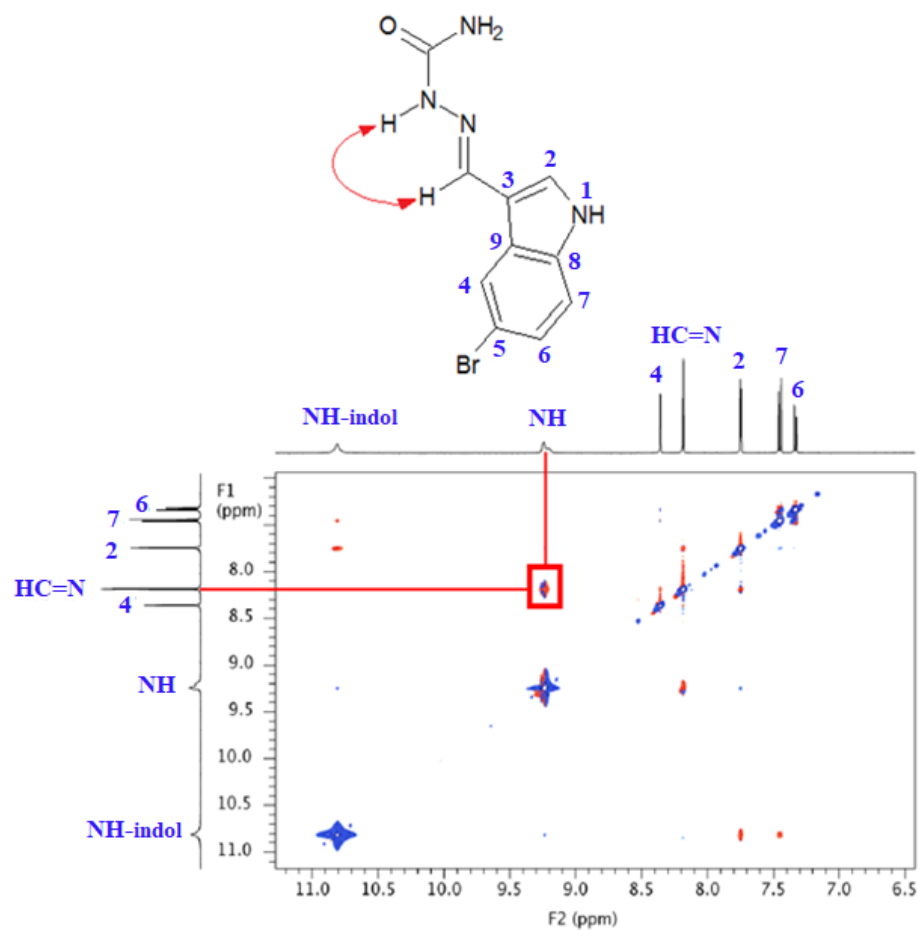

Figure 7. Two-dimensional  $^1\text{H}$ - $^1\text{H}$  NOESY NMR spectrum, recorded in acetone- $d_6$  for the compound **1**



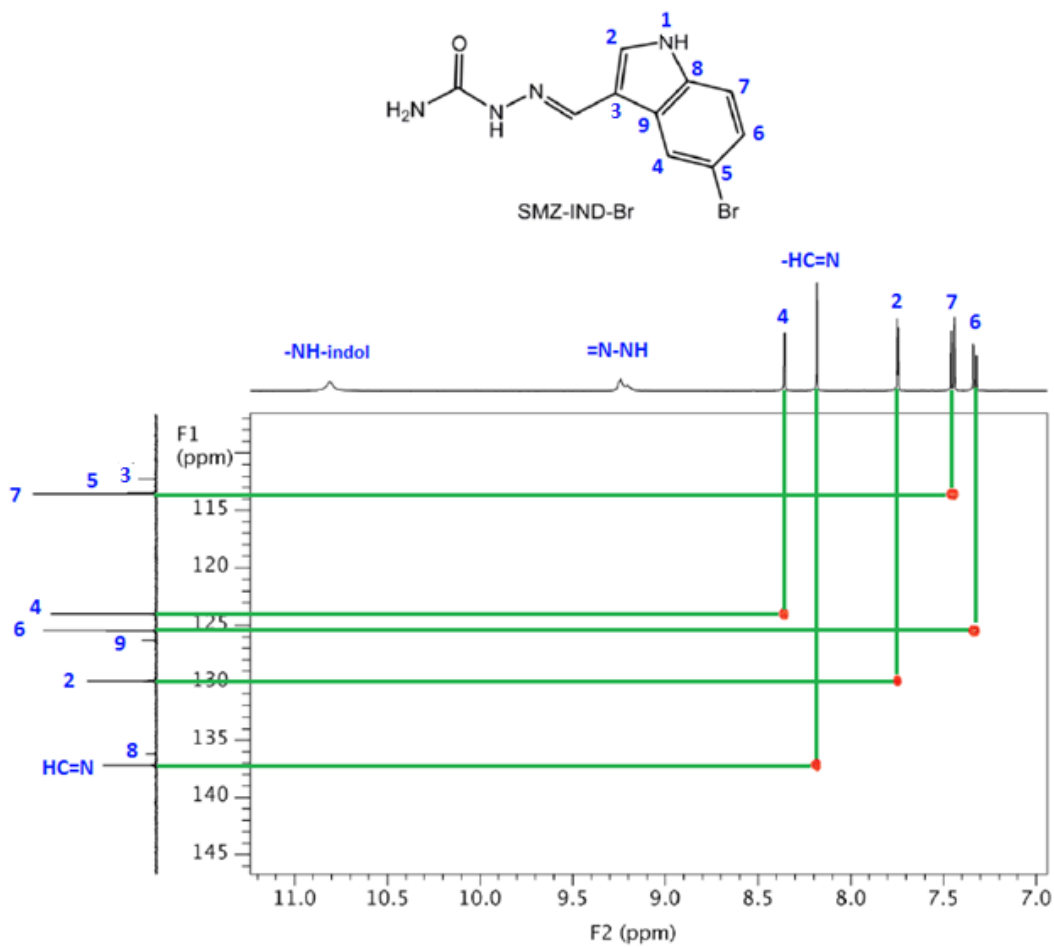

Figure 8. Two-dimensional  $^1\text{H}$ - $^{13}\text{C}$  HSQC NMR spectrum showing the aromatic zone for the compound **1** recorded in acetone- $d_6$

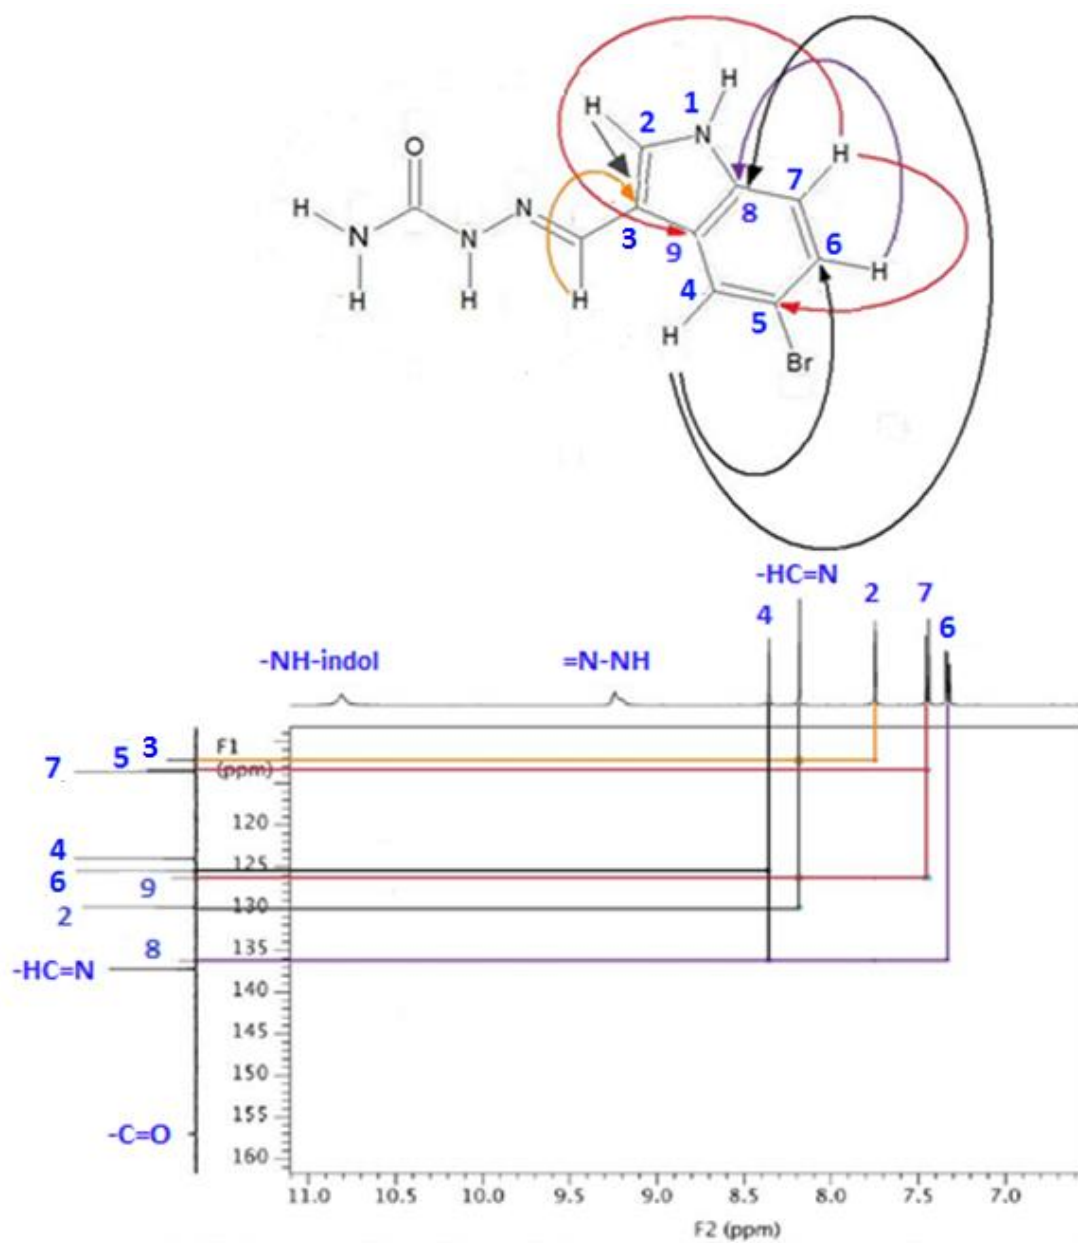

Figure 9. Two-dimensional  $^1\text{H}$ - $^{13}\text{C}$  HMBC NMR spectrum showing the aromatic zone for the compound **1** recorded in acetone- $d_6$

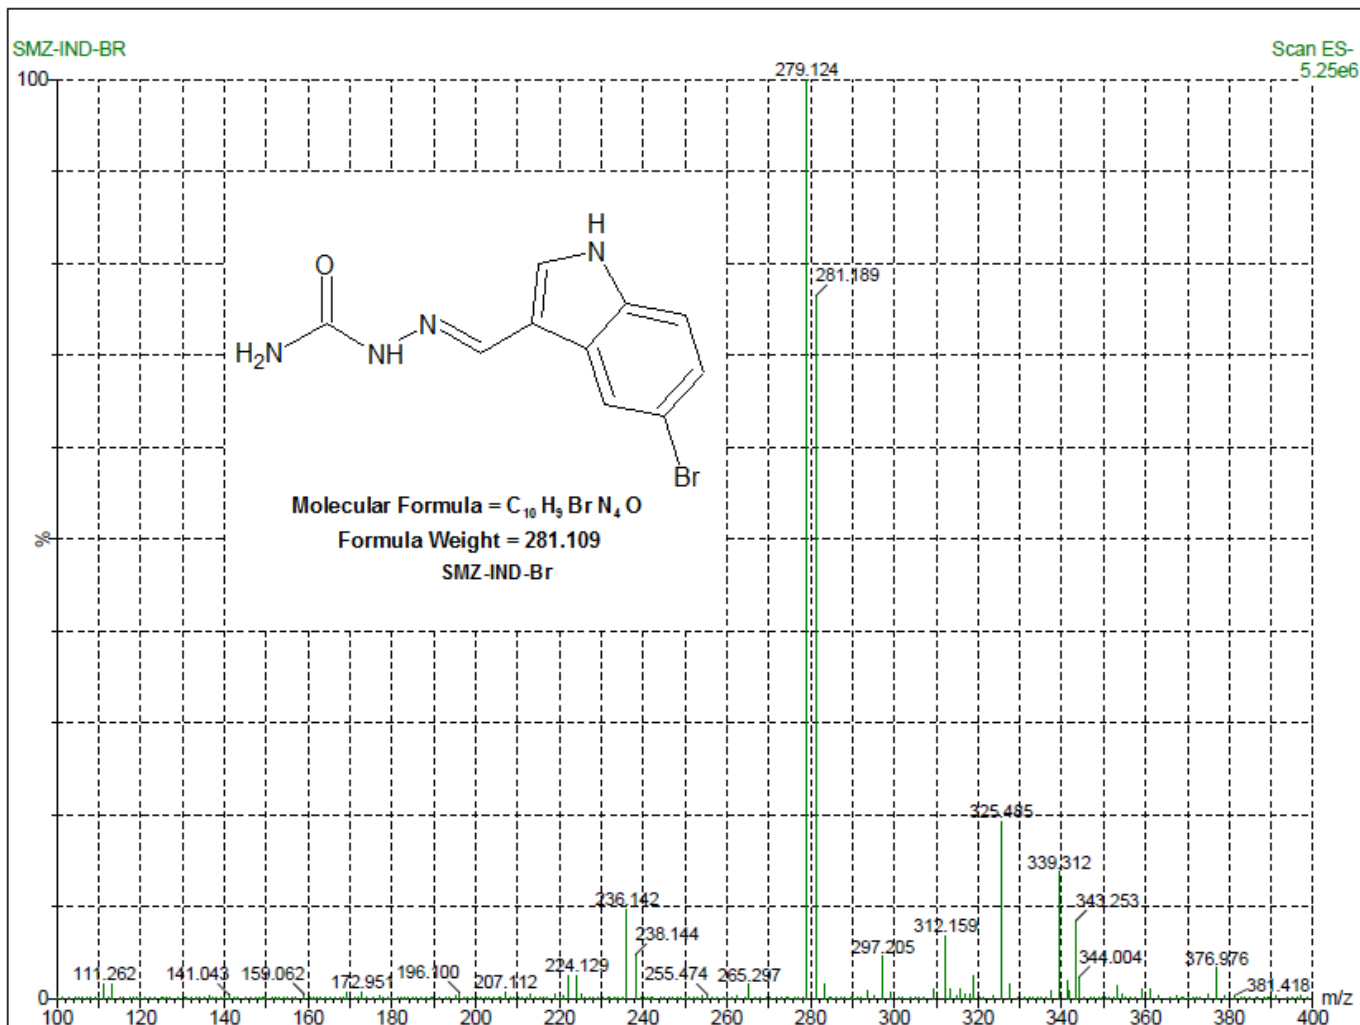

Figure 10. ESI-mass spectrum of the compound **1**

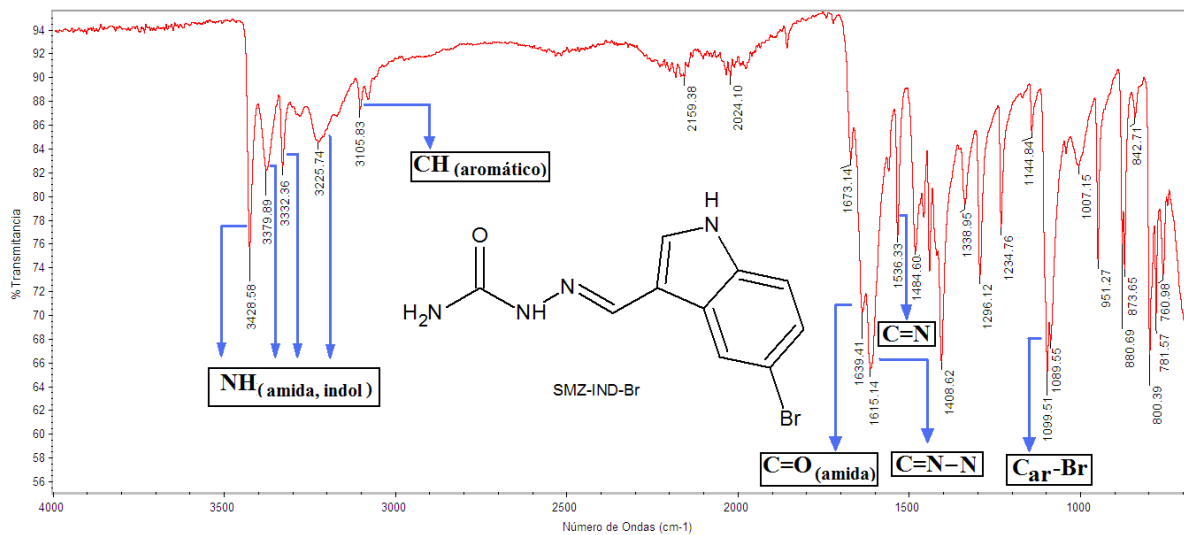

Figure 11. FT-IR spectrum of the compound 1

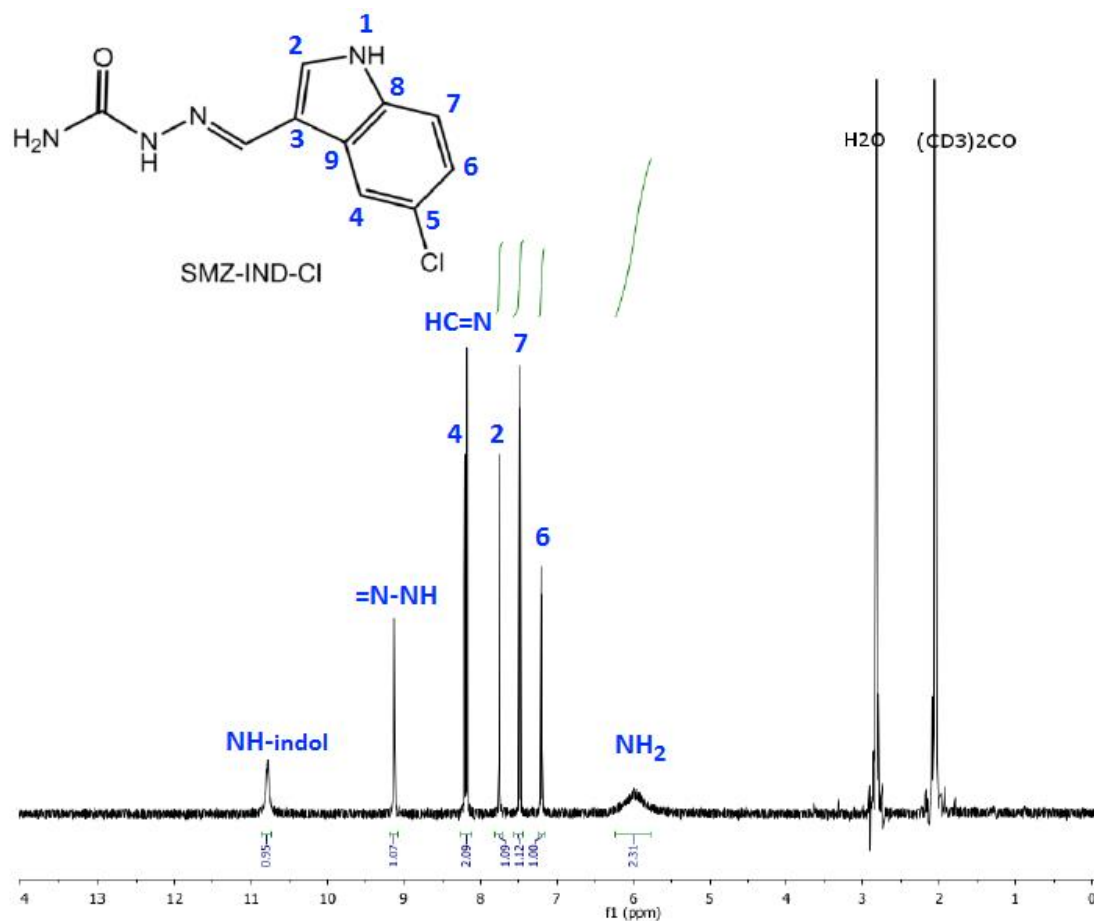

Figure 12. <sup>1</sup>H NMR spectrum of compound 2 (500 MHz, acetone-*d*<sub>6</sub>)

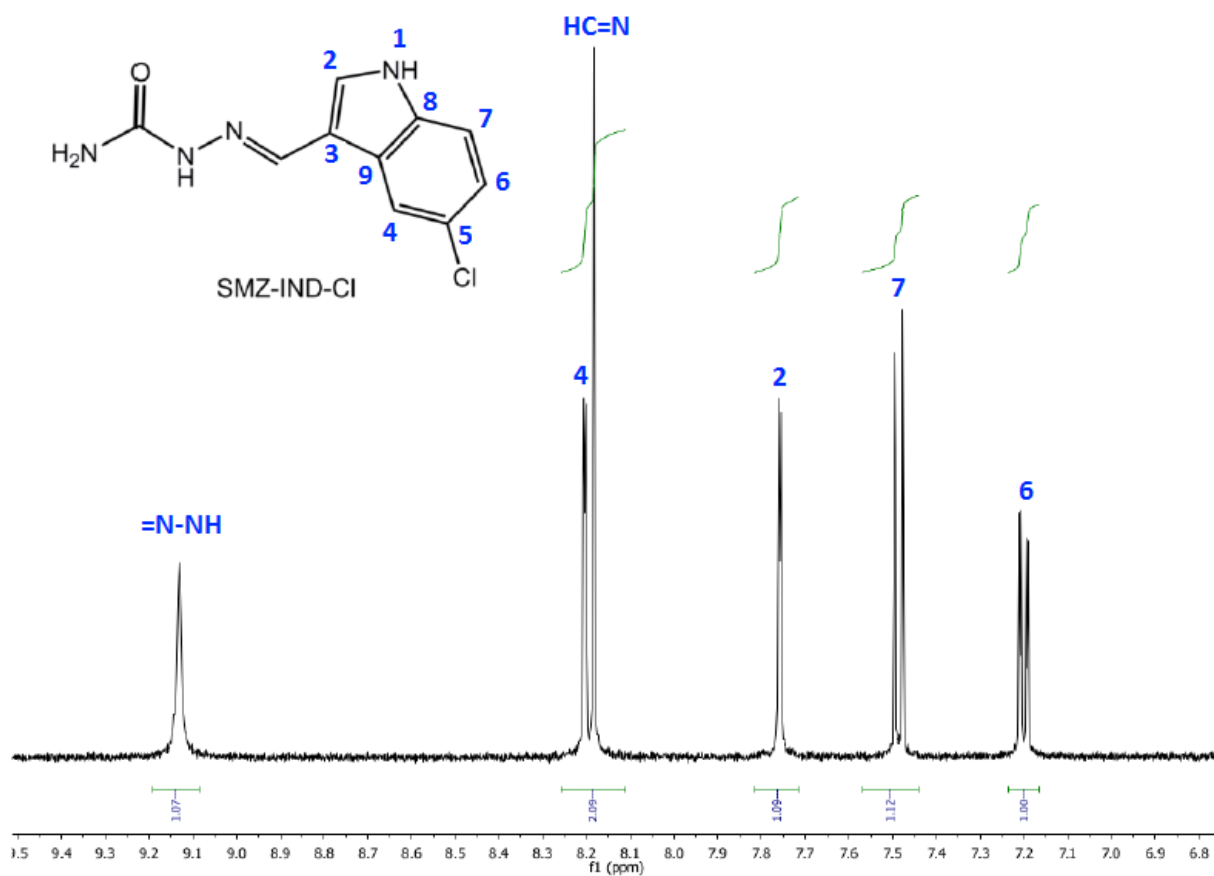

Figure 13. <sup>1</sup>H NMR spectrum showing the aromatic zone of compound 2 (500 MHz, acetone-*d*<sub>6</sub>)

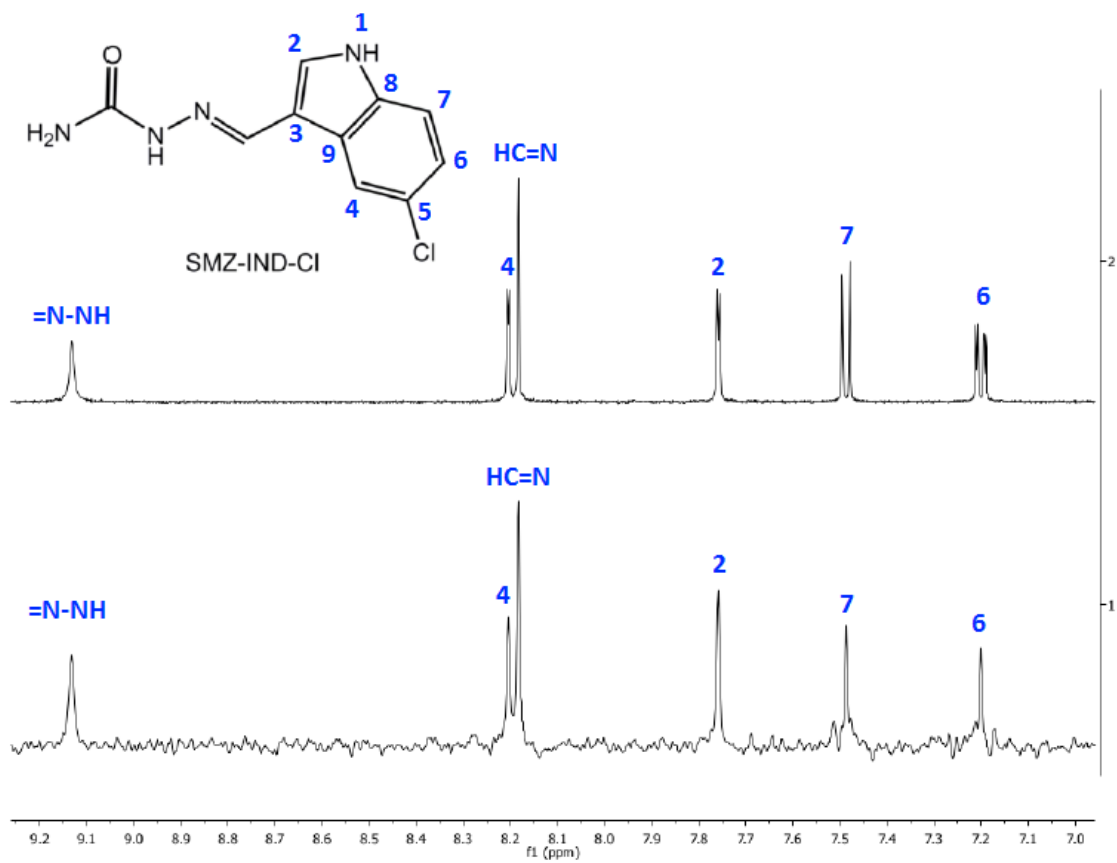

Figure 14. comparison between the experiment "pure shift" of  $^1\text{H}$  (lower) with the NMR spectrum of  $^1\text{H}$  (upper) (500 MHz, acetone- $d_6$ )

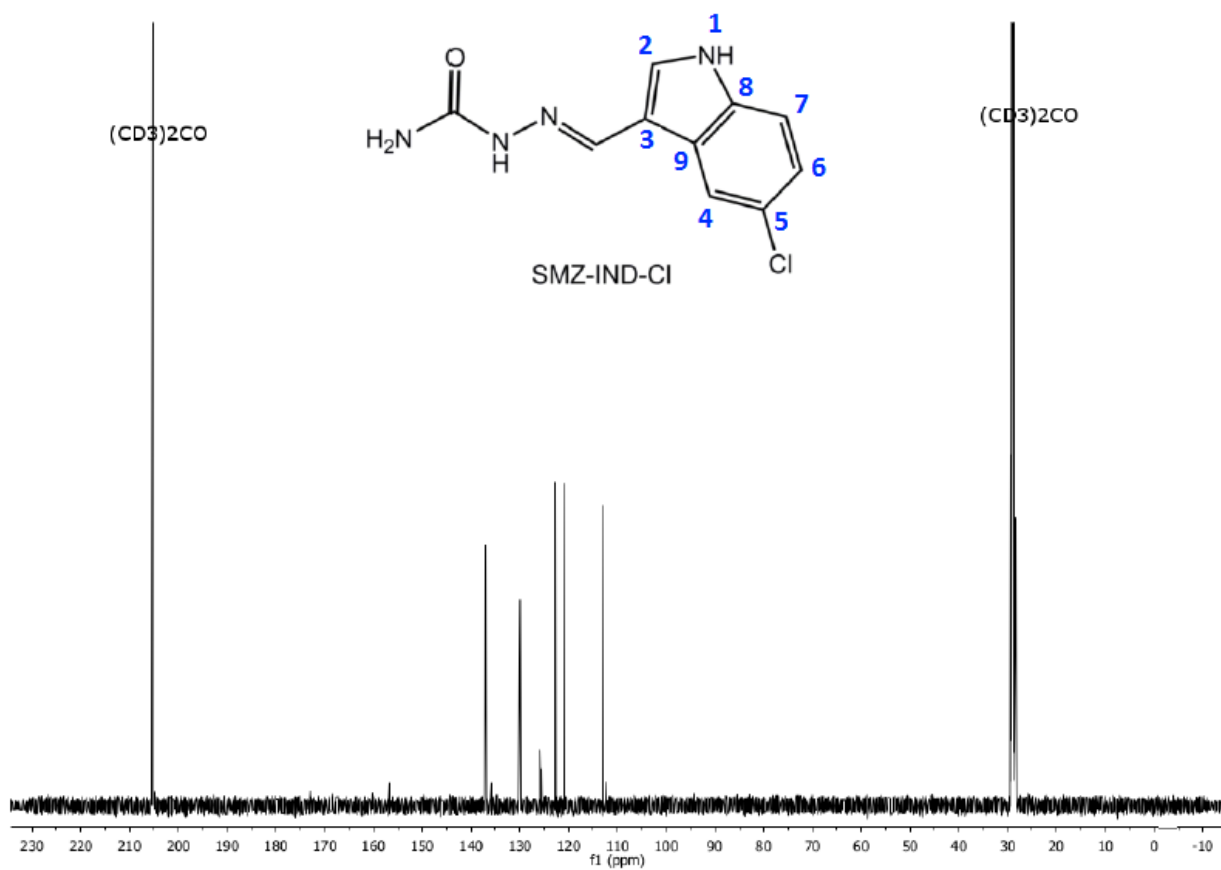

Figure 15.  $^{13}\text{C}\{^1\text{H}\}$ NMR spectrum of compound 2 (126 MHz, acetone- $d_6$ )



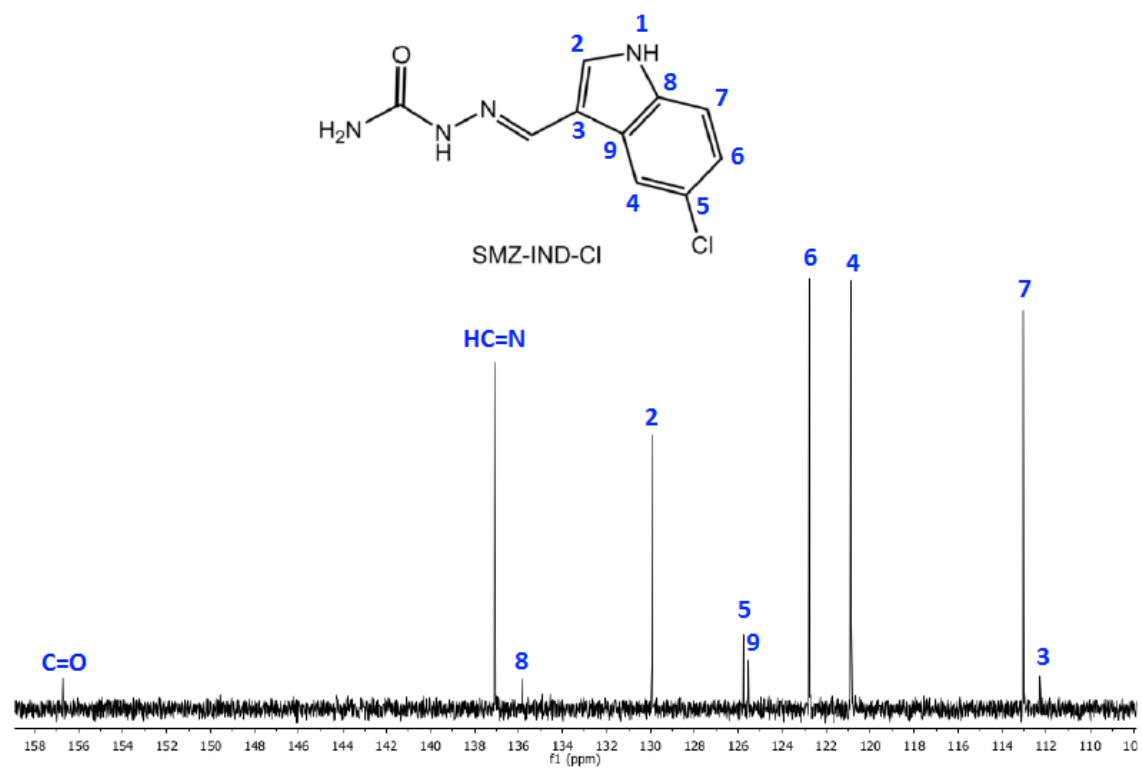

Figure 16.  $^{13}\text{C}\{^1\text{H}\}$ NMR spectrum showing the aromatic zone of compound **2** (126 MHz, acetone- $d_6$ )

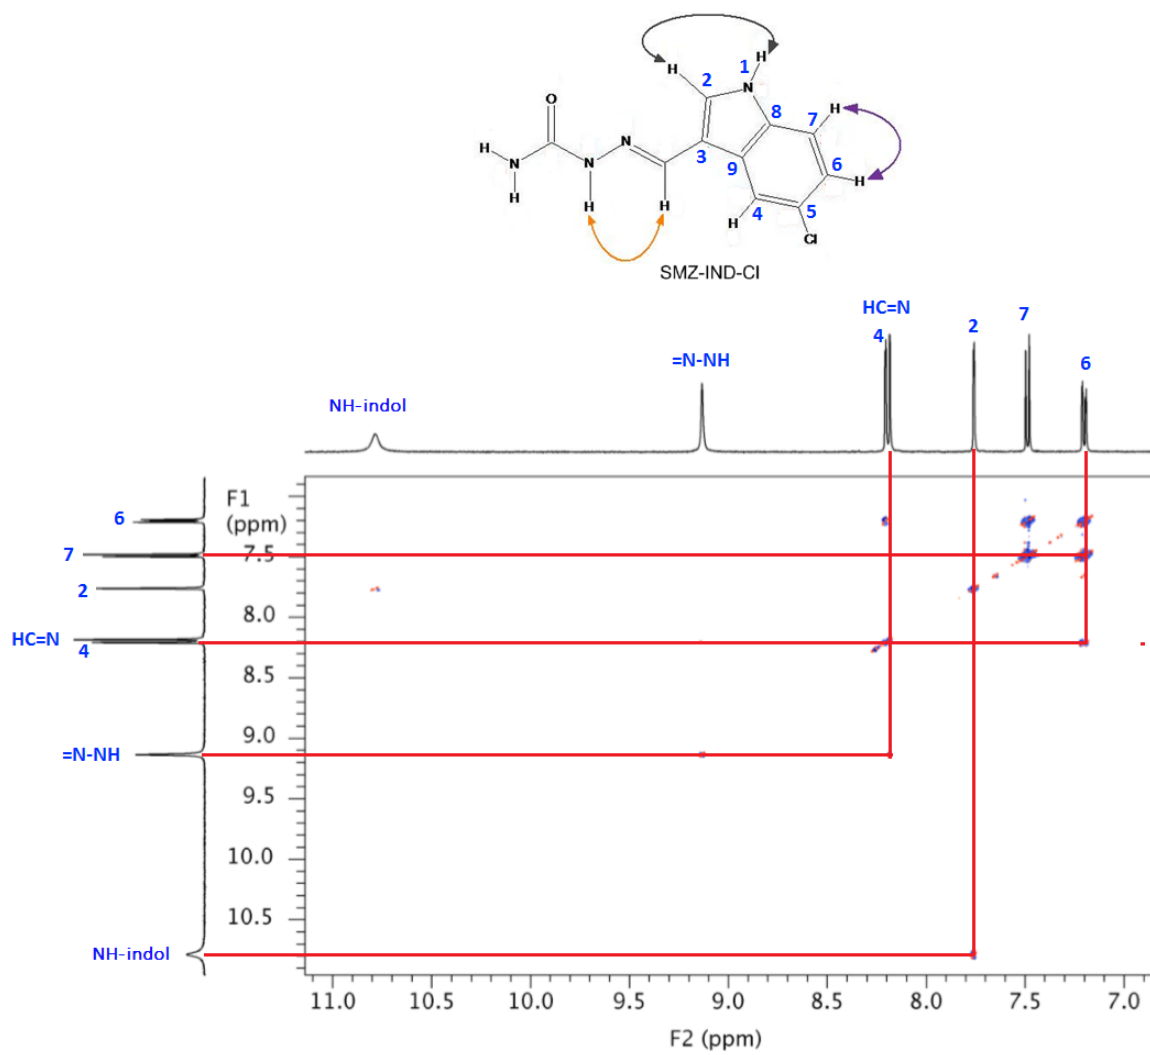

Figure 17. Two-dimensional  $^1\text{H}$ - $^1\text{H}$  DQFCOSY NMR spectrum recorded in acetone- $d_6$  for the compound **2**

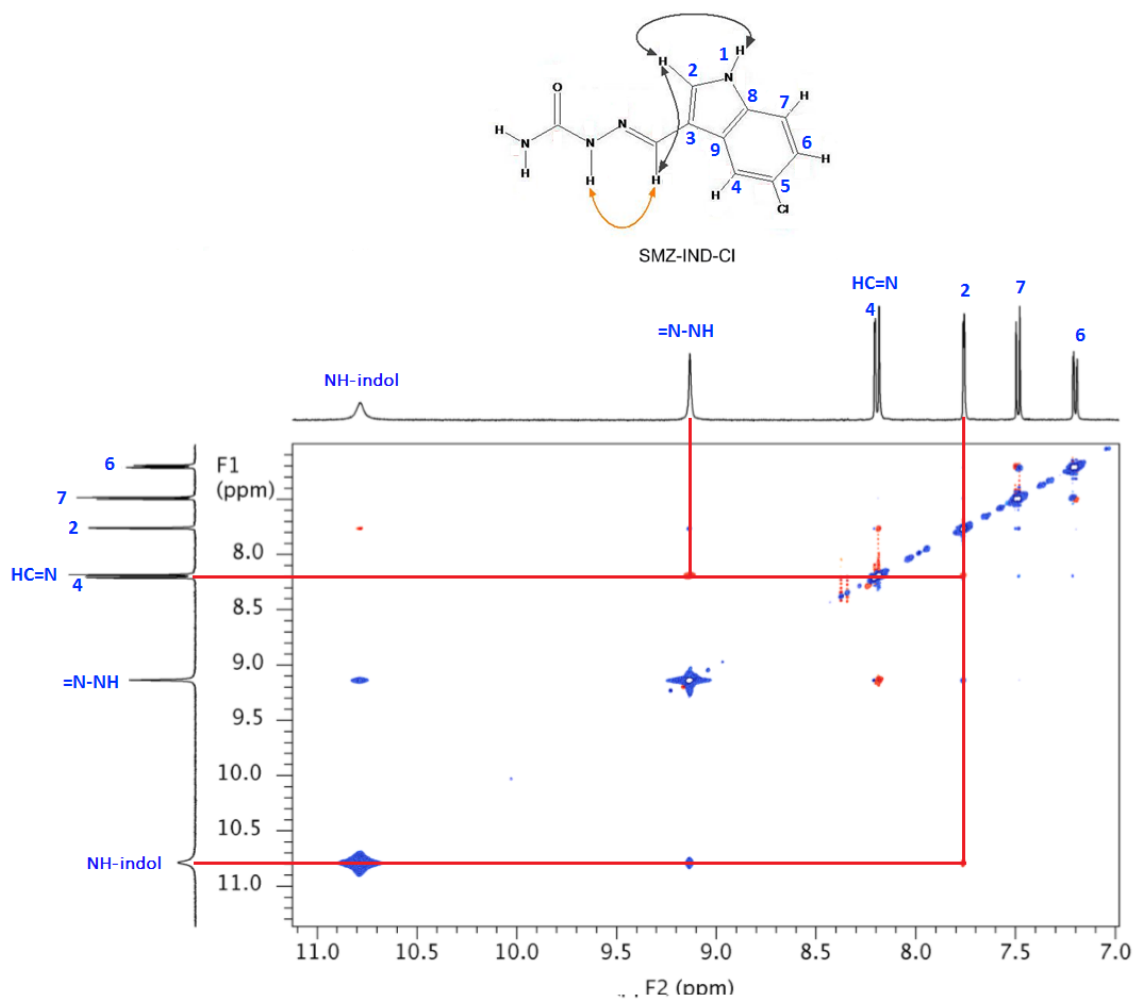

Expansión de la zona aromática del experimento de RMN bidimensional  $^1\text{H}$ - $^1\text{H}$  NOESY

Figure 18. Two-dimensional  $^1\text{H}$ - $^1\text{H}$  NOESY NMR spectrum, recorded in acetone- $d_6$  for the compound **2**

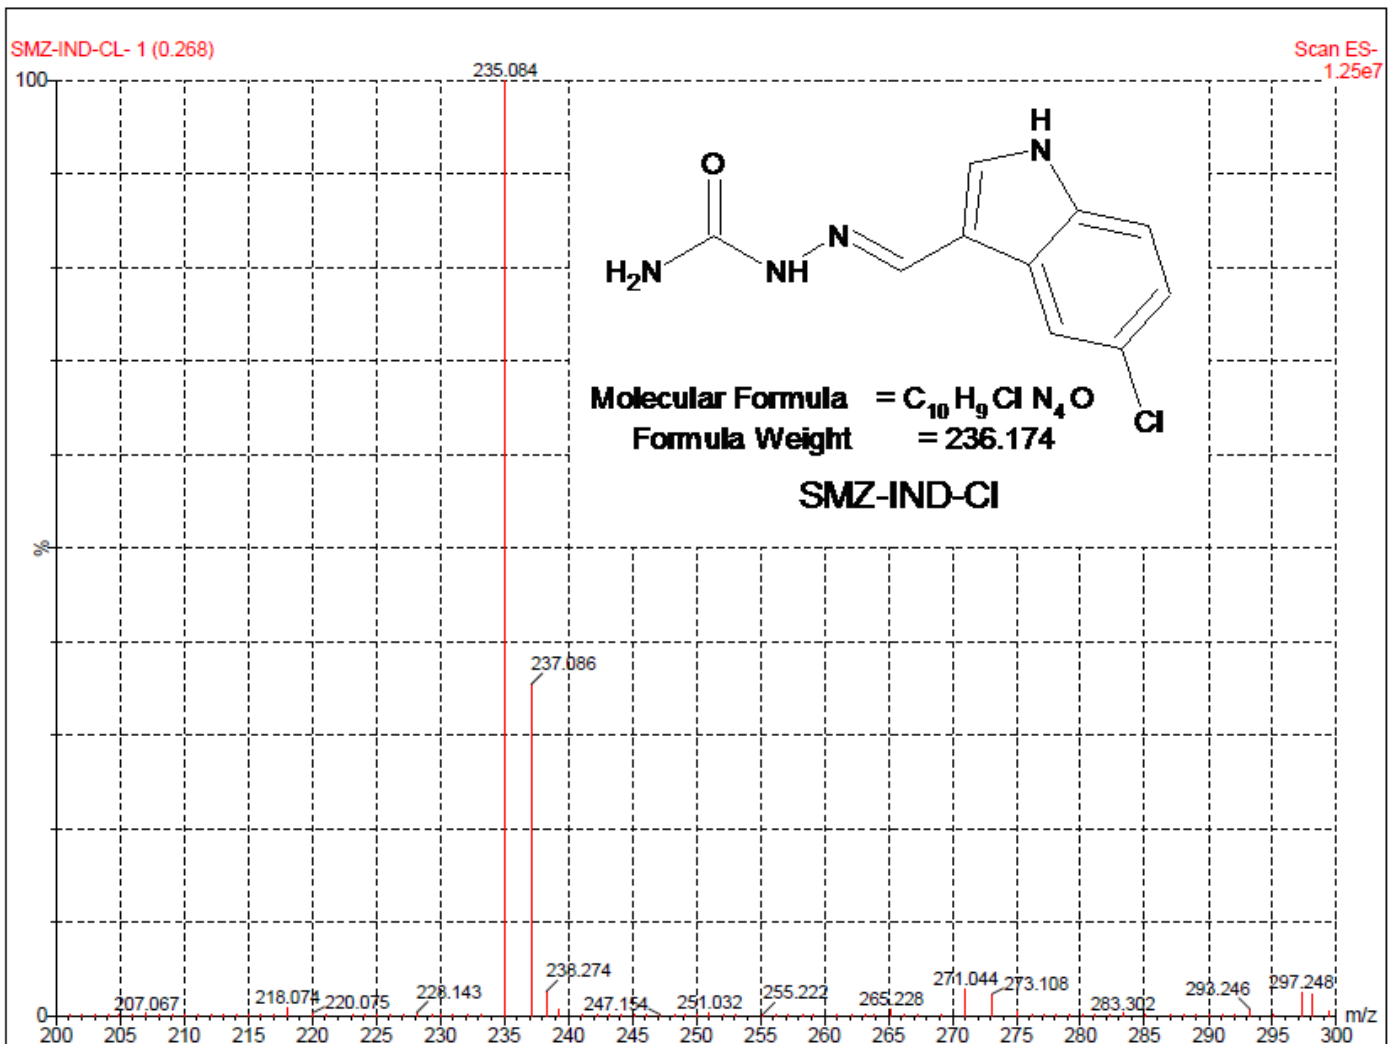

Figure 19. ESI-mass spectrum of the compound 2

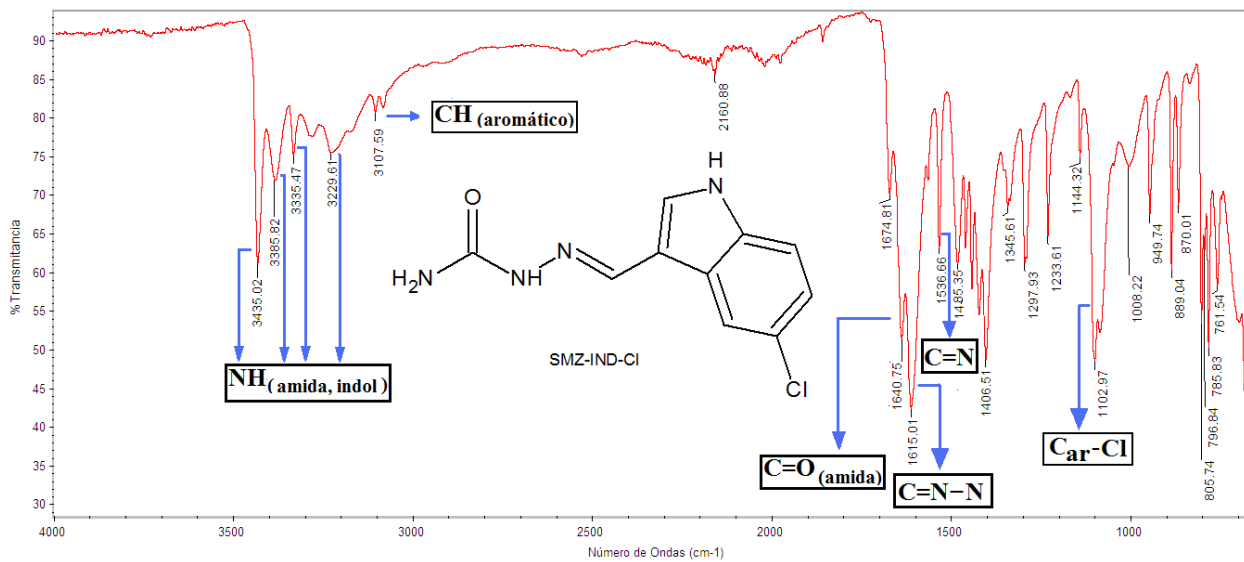

Figure 20. FT-IR spectrum of the compound **2**

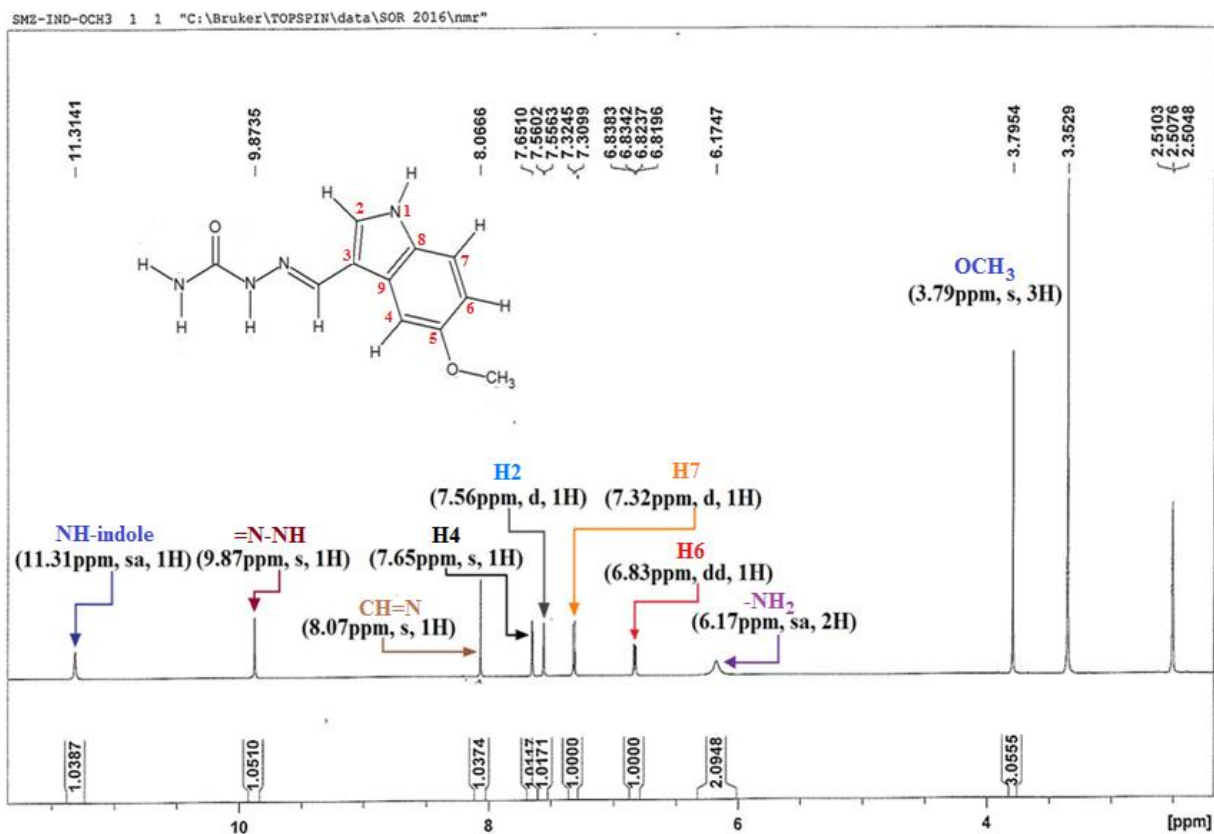

Figure 21. <sup>1</sup>H NMR spectrum of compound 3 (600 MHz, DMSO-*d*<sub>6</sub>)

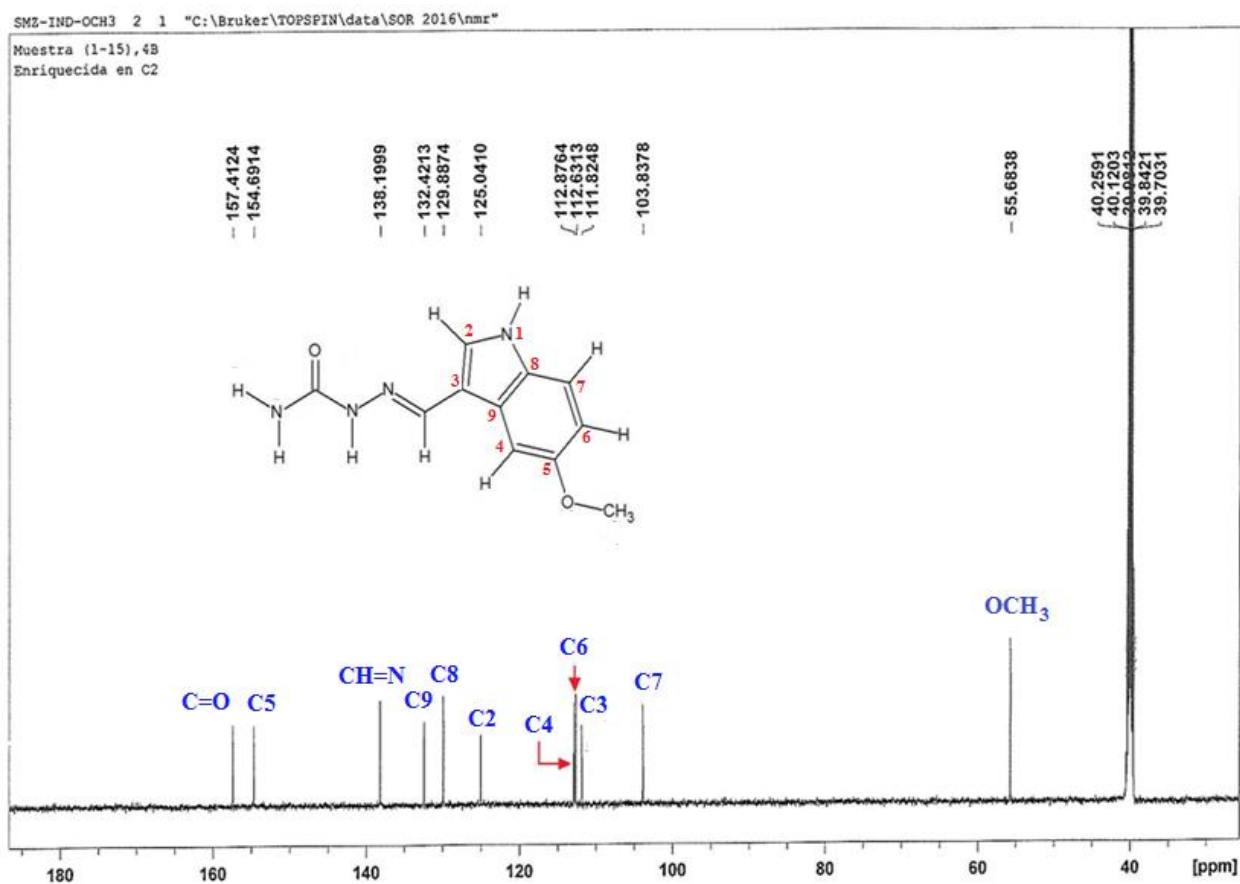

Figure 22.  $^{13}\text{C}$  NMR spectrum of compound 3 (150 MHz, DMSO- $d_6$ )

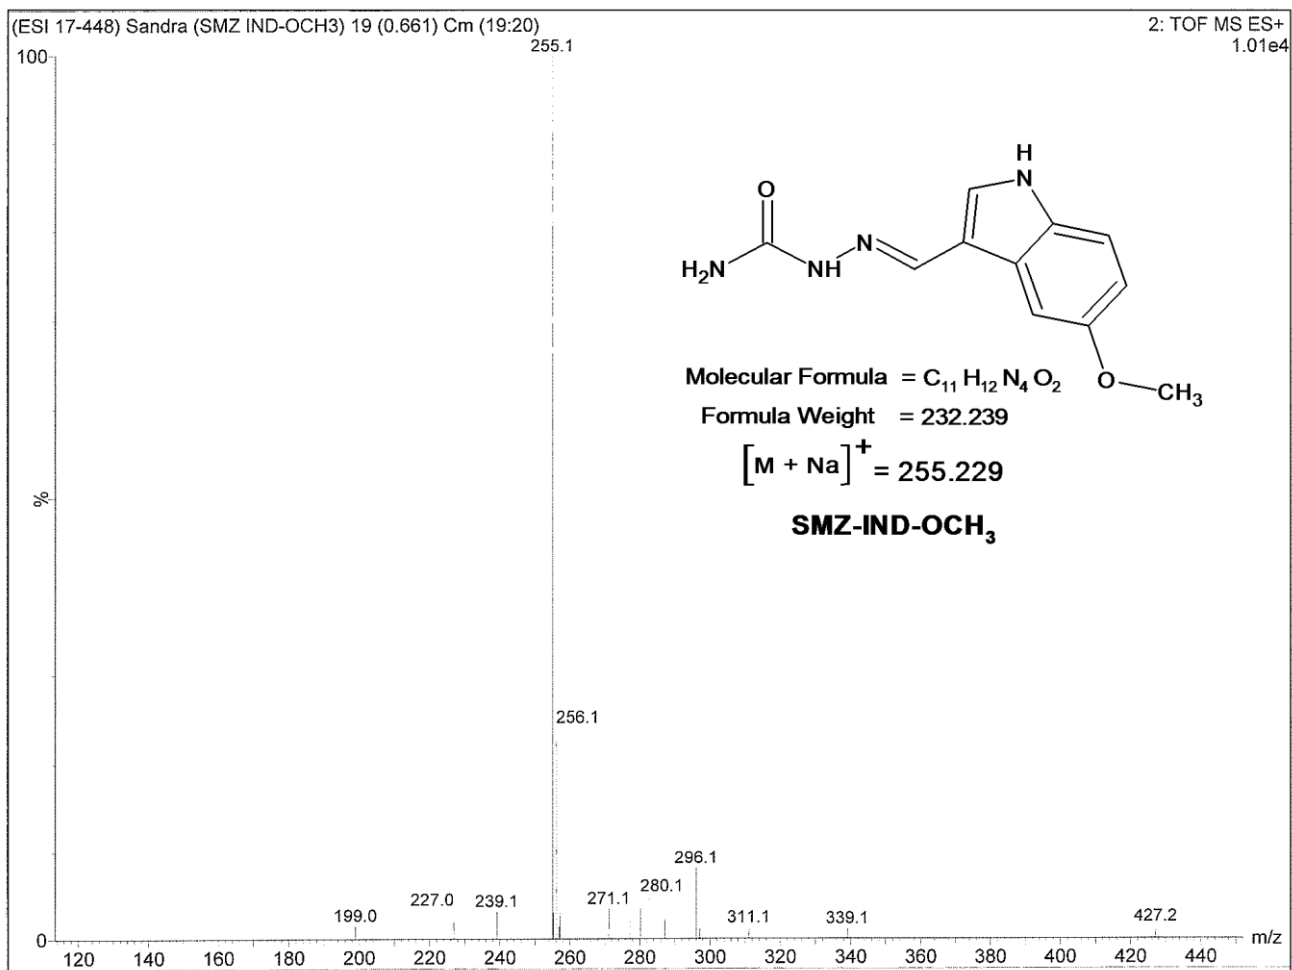

Figure 23. ESI-mass spectrum of the compound **3**



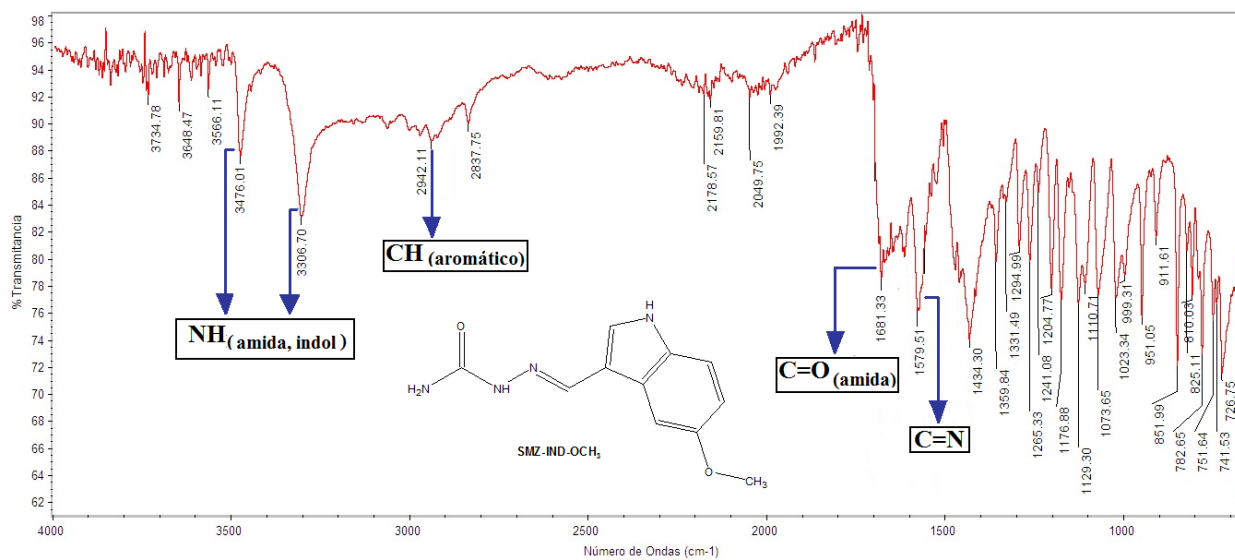

Figure 24. FT-IR spectrum of the compound 3

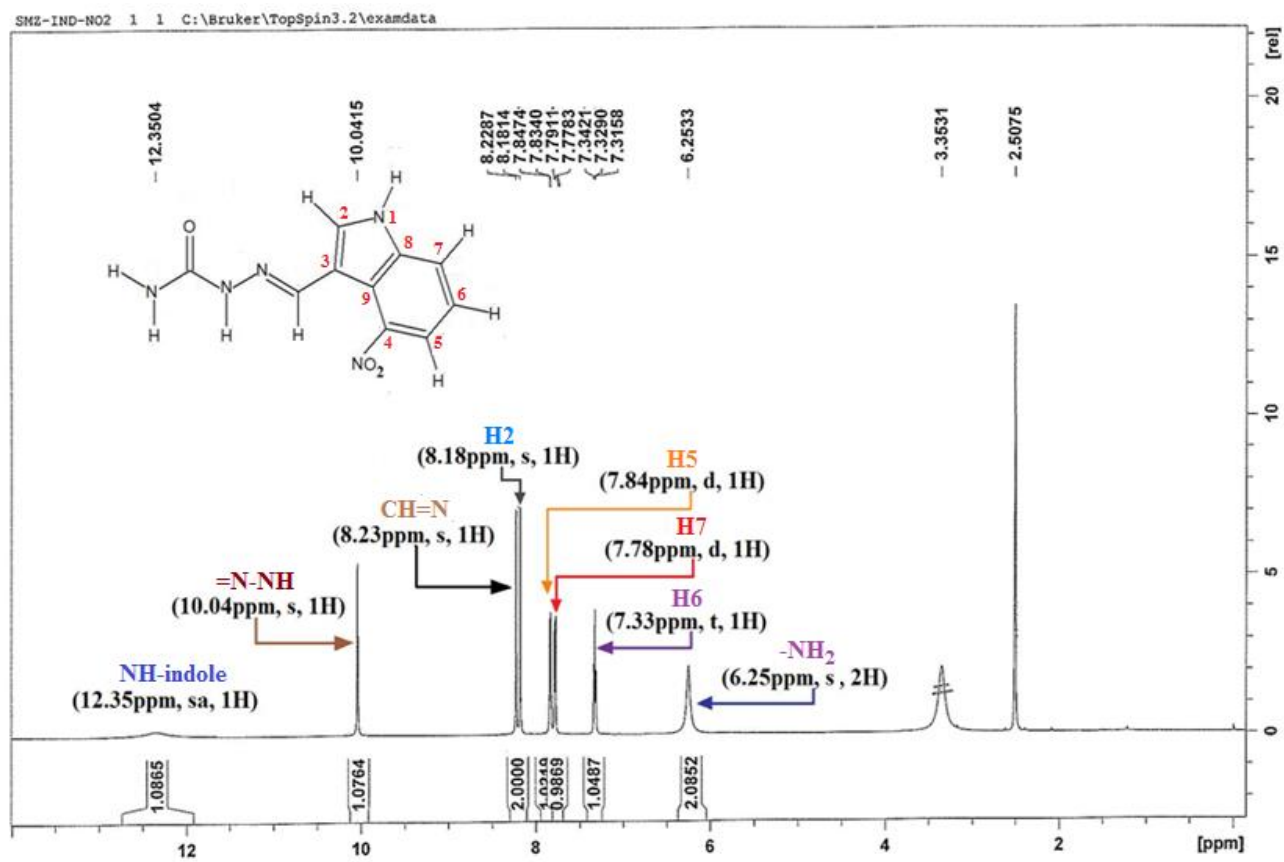

Figure 25. <sup>1</sup>H NMR spectrum of compound 4 (600 MHz, DMSO-*d*<sub>6</sub>)

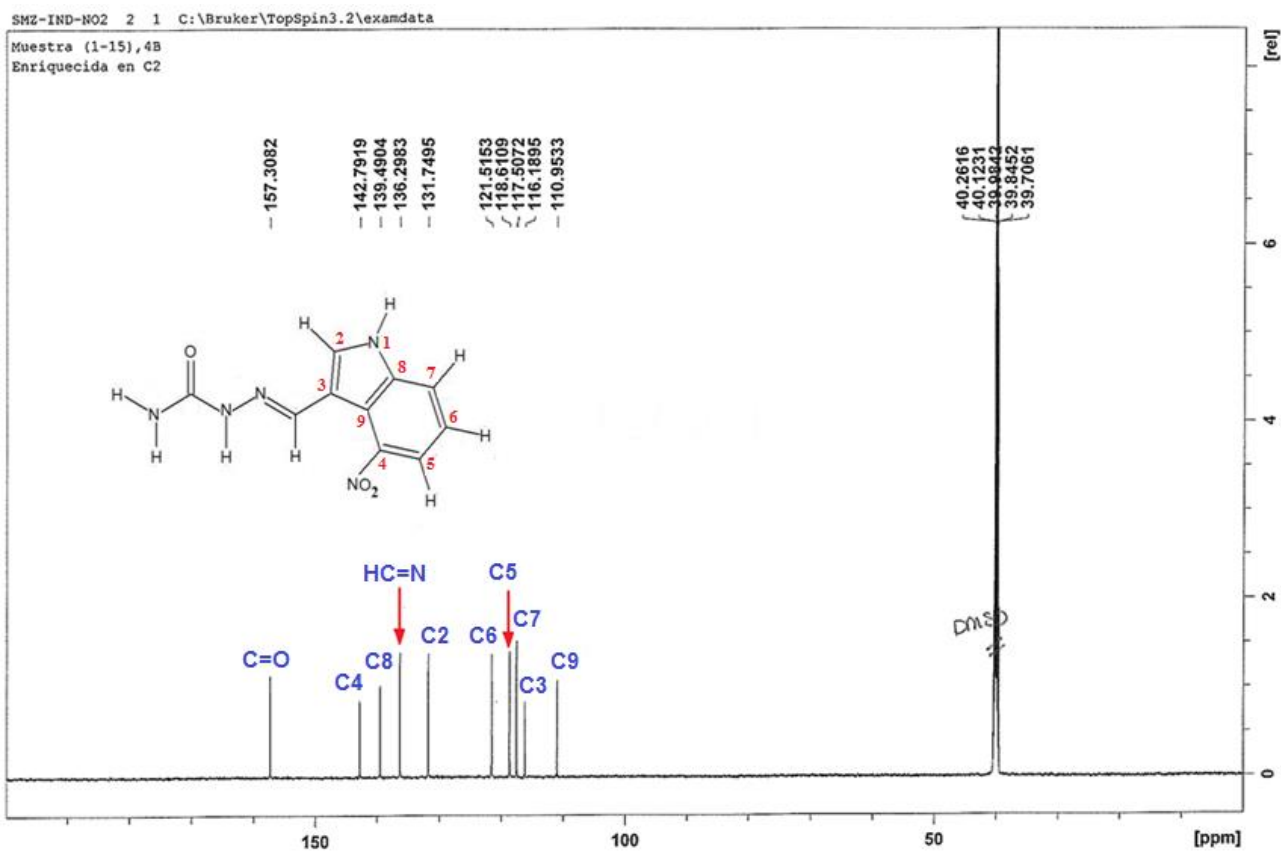

Figure 26. <sup>13</sup>C NMR spectrum of compound 4 (150 MHz, DMSO-*d*<sub>6</sub>)

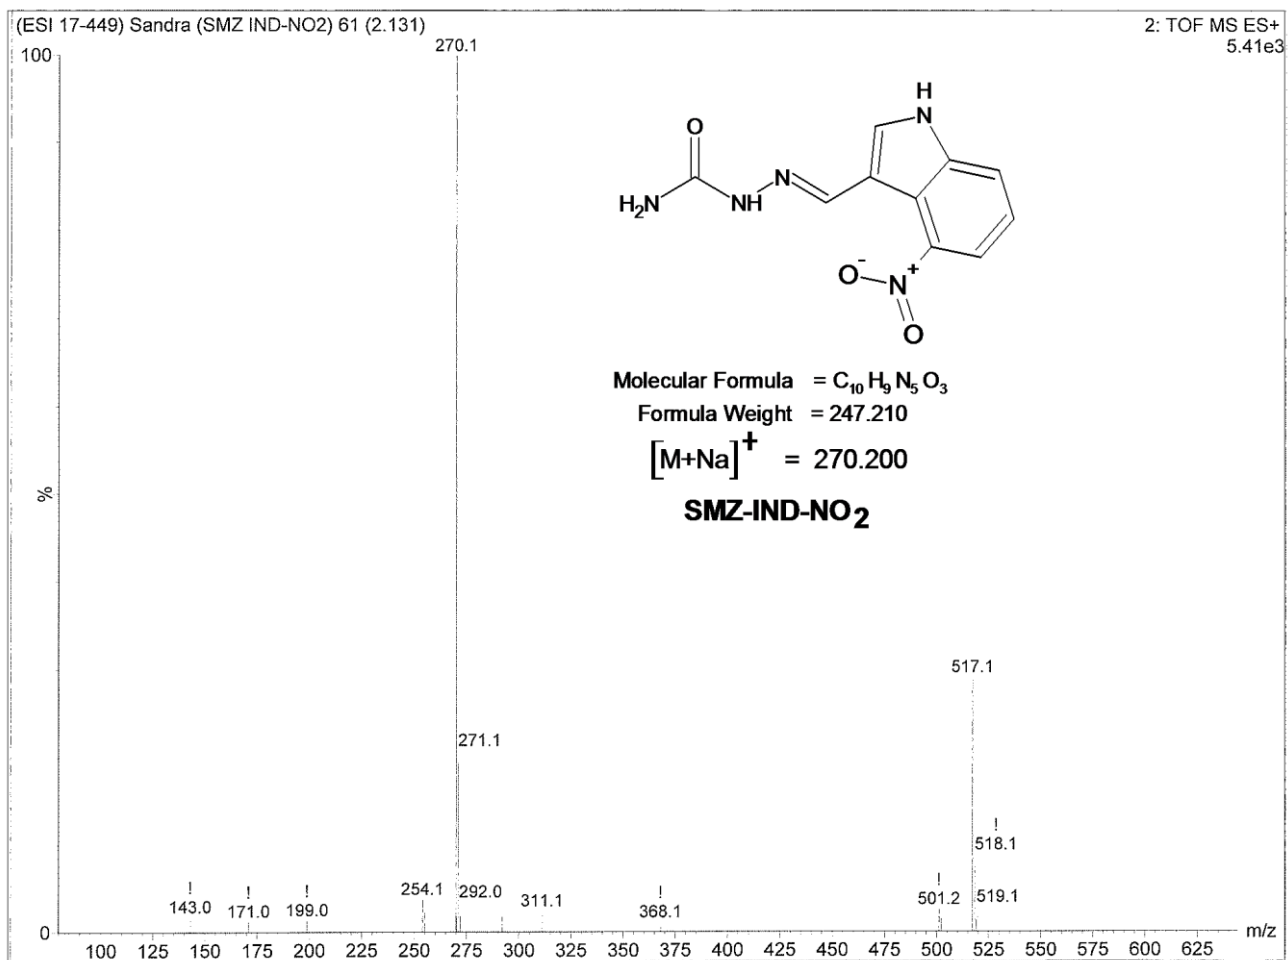

Figure 27. ESI-mass spectrum of the compound **4**

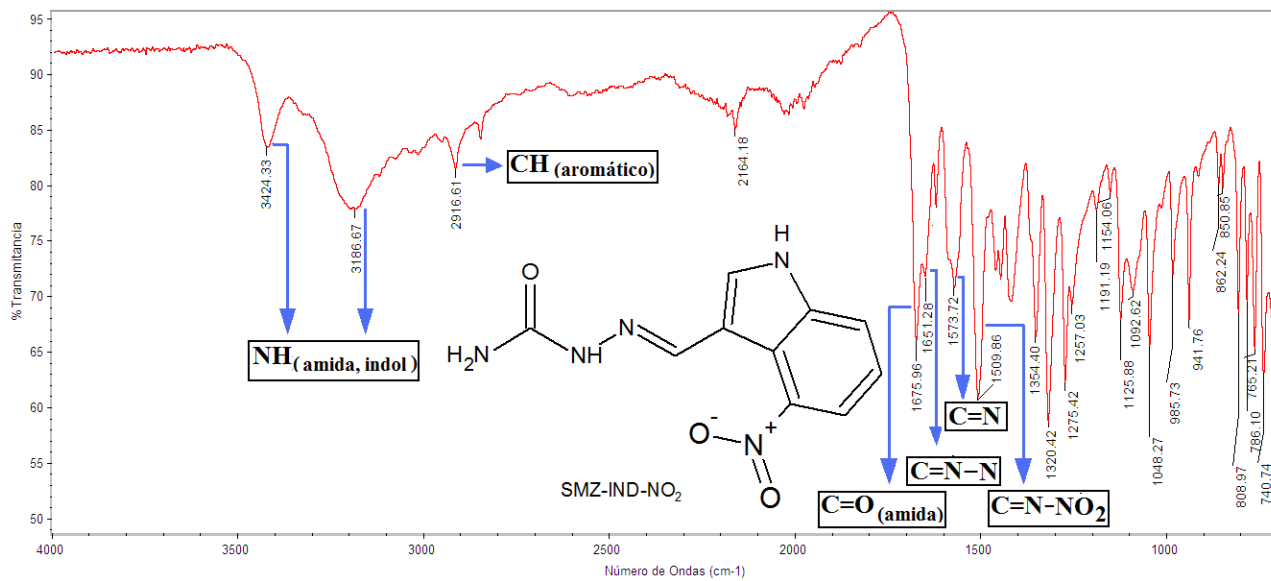

Figure 28. FT-IR spectrum of the compound **4**
